# Supplementary material for: Barium titanate photocatalysts with silver–manganese dual cocatalyst for carbon dioxide reduction with water
Source: Royal Society of Chemistry journal article supplement (doi:10.1039/d4dt01147c), 2024-01-01
Supplement: d4dt01147c1.pdf [file d4dt01147c1.pdf]

Supplementary information

## **Barium titanate photocatalysts with silver-manganese dual cocatalyst for carbon dioxide reduction with water**

Shuwei Liu, Hongxuan Qiu, Akira Yamamoto and Hisao Yoshida\*

Graduate School of Human and Environmental Studies, Kyoto University, Kyoto 606-8501, Japan

\* [yoshida.hisao.2a@kyoto-u.ac.jp](mailto:yoshida.hisao.2a@kyoto-u.ac.jp)

## Experimental Section

### Preparation of samples

A phase diagram of barium titanates (a BaO-TiO<sub>2</sub> system) was proposed in literature.<sup>1</sup> BaTi<sub>n</sub>O<sub>2n+1</sub> (n=1, 5) and Ba<sub>2(n-1)</sub>Ti<sub>4n+1</sub>O<sub>10n</sub> (n=2,3,4) were prepared by a solid state reaction method.<sup>2-4</sup> Briefly, the precursors, BaCO<sub>3</sub> (Rare Metallic Co., Ltd.) and TiO<sub>2</sub> (rutile, Kojundo Chemical Lab. Co., Ltd) with stoichiometric molar ratio were mixed for about 20 minutes in an alumina mortar and calcined at 1273 K, 4 h for BaTiO<sub>3</sub> (BT), at 1523 K, 10 h for Ba<sub>6</sub>Ti<sub>17</sub>O<sub>40</sub> (B6T17), at 1423 K, 10 h for Ba<sub>4</sub>Ti<sub>13</sub>O<sub>30</sub> (B4T13), at 1523 K, 10 h for Ba<sub>2</sub>Ti<sub>9</sub>O<sub>20</sub> (B2T9), and at 1373 K, 4 h for BaTi<sub>5</sub>O<sub>11</sub> (BT5), respectively.

A flux method was used in the preparation of BaTi<sub>2</sub>O<sub>5</sub> (BT2) with NaCl (Kishida Chemical Co., Ltd.) and KCl (Nacalai Tesque, Inc.) as a binary flux according to the literature.<sup>5</sup> In short, BaCO<sub>3</sub>, TiO<sub>2</sub> and the binary flux (NaCl-KCl, 1:1) were mixed with in an overall stoichiometric ratio of 1:2:20, the obtained powder was heated at 1148 K for 9 h. The powder after heating was collected and washed 3 times with hot water of 353 K to remove the flux. The powder after filtration was collected and then dried at 373 K for 24 h.

Although Ag cocatalyst was mainly loaded by using photodeposition method, an impregnation (IMP) method was also used to load Ag cocatalyst on the prepared barium titanate samples for the photocatalytic CO<sub>2</sub> reduction as follows. 2 g of the prepared barium titanates and 372 μl of 0.5 M AgNO<sub>3</sub> was dispersed into 100 mL distilled water. The obtained suspension was stirred magnetically and dried up at 353 K, followed by calcined in a muffle furnace at 723 K for 2 h.

### Photocatalytic reaction test

The reactor for the photocatalytic reaction test was shown in Figure S1.

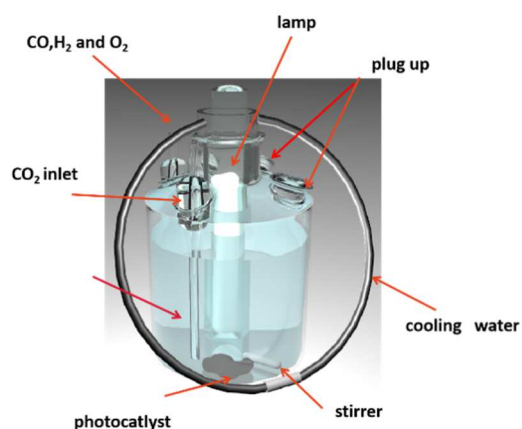

**Fig. S1** Image of the inner-irradiation reactor used in the present study.

### Analysis of hydrogen peroxide

To confirm hydrogen peroxide ( $\text{H}_2\text{O}_2$ ) formation, permanganate titration in neutral conditions were conducted.<sup>6,7</sup> After the photocatalytic reaction test, 10 mL of 0.2 mM  $\text{KMnO}_4$  solution was used as reference, 300  $\mu\text{L}$  solution from reactions after filtration or 0.3 mM  $\text{H}_2\text{O}_2$  solution were added into  $\text{KMnO}_4$  solution. The remaining concentration of  $\text{KMnO}_4$  was determined by the absorbance of solution at  $\lambda_{\text{max}}$  at 525 nm measured by UV-vis spectroscopy in a transmission mode, from which the amount of  $\text{H}_2\text{O}_2$  produced was calculated.

## Results and discussion

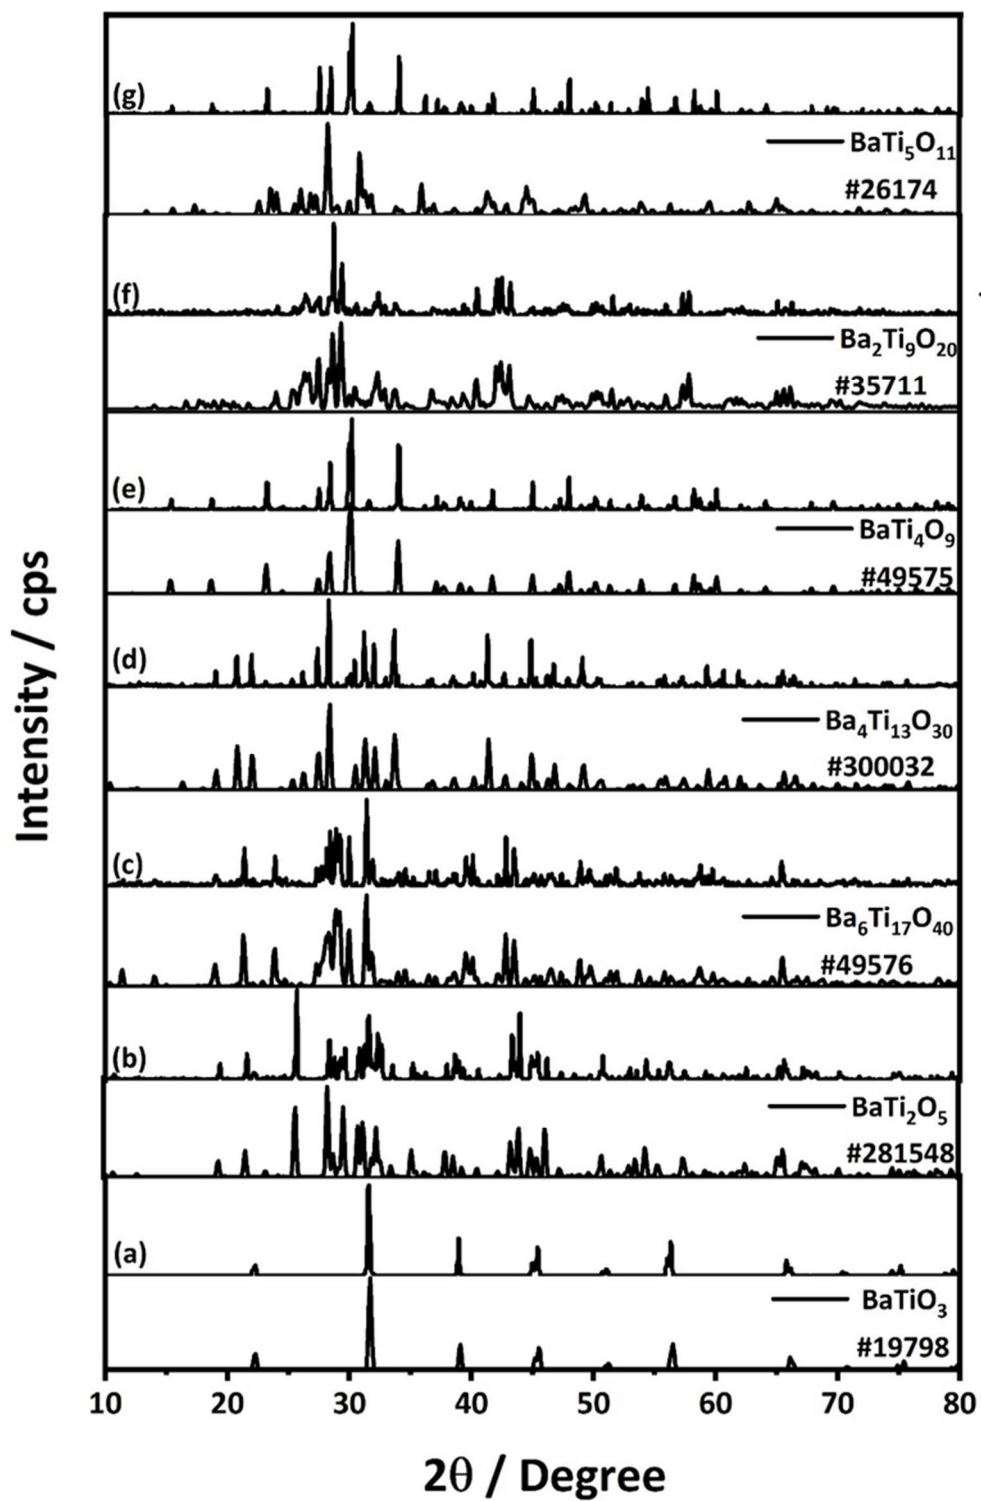

**Fig. S2** XRD patterns of the samples, (a) BT, (b) BT2, (c) B6T17, (d) B4T13, (e) BT4, (f) B2T9, and (g) B5T11 with corresponding references from ICSD database.

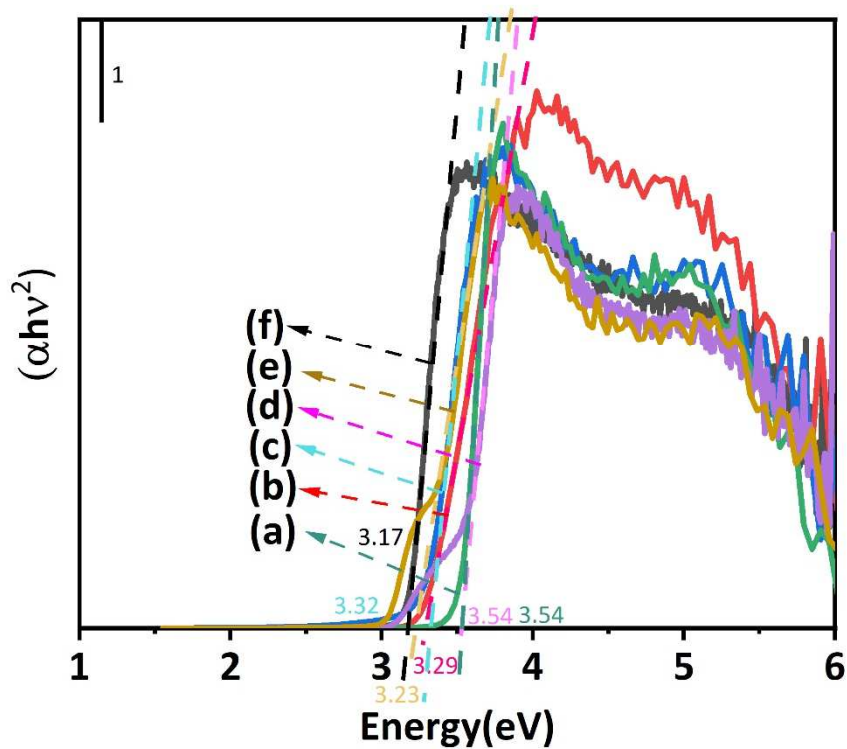

**Fig. S3** Tauc plots of prepared B4T13 (a), BT2 (b), B6T17 (c), BT4 (d), B2T9 (e), and BT (f) samples.

**Table S1** Estimated bandgap and bottom of conduction band of the samples.

| Entry | Samples | Bandgap (eV) <sup>a</sup> | Estimated bottom of conduction Band (eV) <sup>b</sup> |
|-------|---------|---------------------------|-------------------------------------------------------|
| 1     | BT      | 3.17                      | -0.43                                                 |
| 2     | BT2     | 3.29                      | -0.55                                                 |
| 3     | B6T17   | 3.32                      | -0.58                                                 |
| 4     | B4T13   | 3.54                      | -0.80                                                 |
| 5     | BT4     | 3.54                      | -0.80                                                 |
| 6     | B2T9    | 3.23                      | -0.49                                                 |

<sup>a</sup> The bandgap was estimated from each DR UV-vis spectrum (Fig. S3).

<sup>b</sup> The conduction band was estimated from the bandgap and the assumption that the top of their valence band are very close to each other.<sup>8</sup>

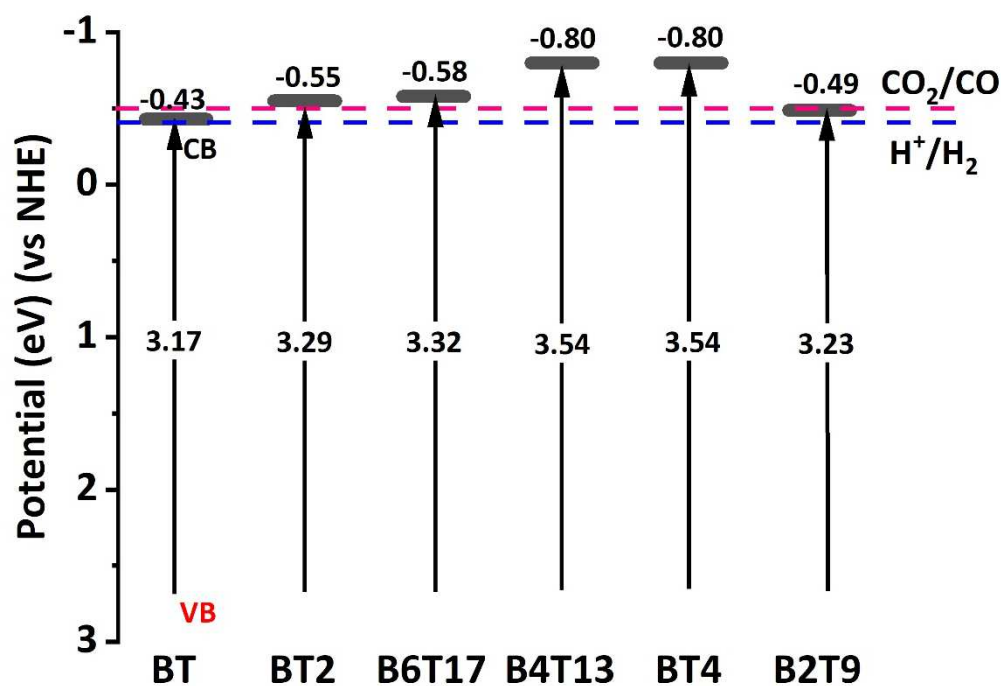

**Fig. S4** The potential of the conduction band bottom of the barium titanate samples. The values are from Table S3.

**Table S2** Crystal structure parameters of barium titanates.

| Entry | Crystal | a, b, c (Å)                 | $\alpha, \beta, \gamma$ (°) | Crystal system | Cell volume (Å <sup>3</sup> ) | PF (%) <sup>a</sup> |
|-------|---------|-----------------------------|-----------------------------|----------------|-------------------------------|---------------------|
| 1     | BT      | 3.789,<br>5.675,<br>5.693   | 90.0,<br>90.0,<br>90.0      | Orthorhombic   | 128.85                        | 71.56               |
| 2     | BT2     | 9.409,<br>3.932,<br>16.907  | 90.0,<br>103.0,<br>90.0     | Monoclinic     | 608.21                        | 68.56               |
| 3     | B6T17   | 9.887,<br>17.097,<br>18.918 | 90.0,<br>98.7,<br>90.0      | Monoclinic     | 3160.90                       | 70.62               |
| 4     | B4T13   | 170.62,<br>9.862,<br>14.051 | 90.0,<br>90.0,<br>90.0      | Orthorhombic   | 2364.3                        | 66.12               |
| 5     | BT4     | 14.530,<br>3.790,<br>6.290  | 90.0,<br>90.0,<br>90.0      | Orthorhombic   | 346.38                        | 61.03               |
| 6     | B2T9    | 14.358,<br>14.095,<br>7.477 | 95.5,<br>100.6,<br>89.9     | Triclinic      | 1480.45                       | 67.18               |

<sup>a</sup> Crystal packing factor (PF) was calculated as the ratio of volume of atoms to the unit cell volume.

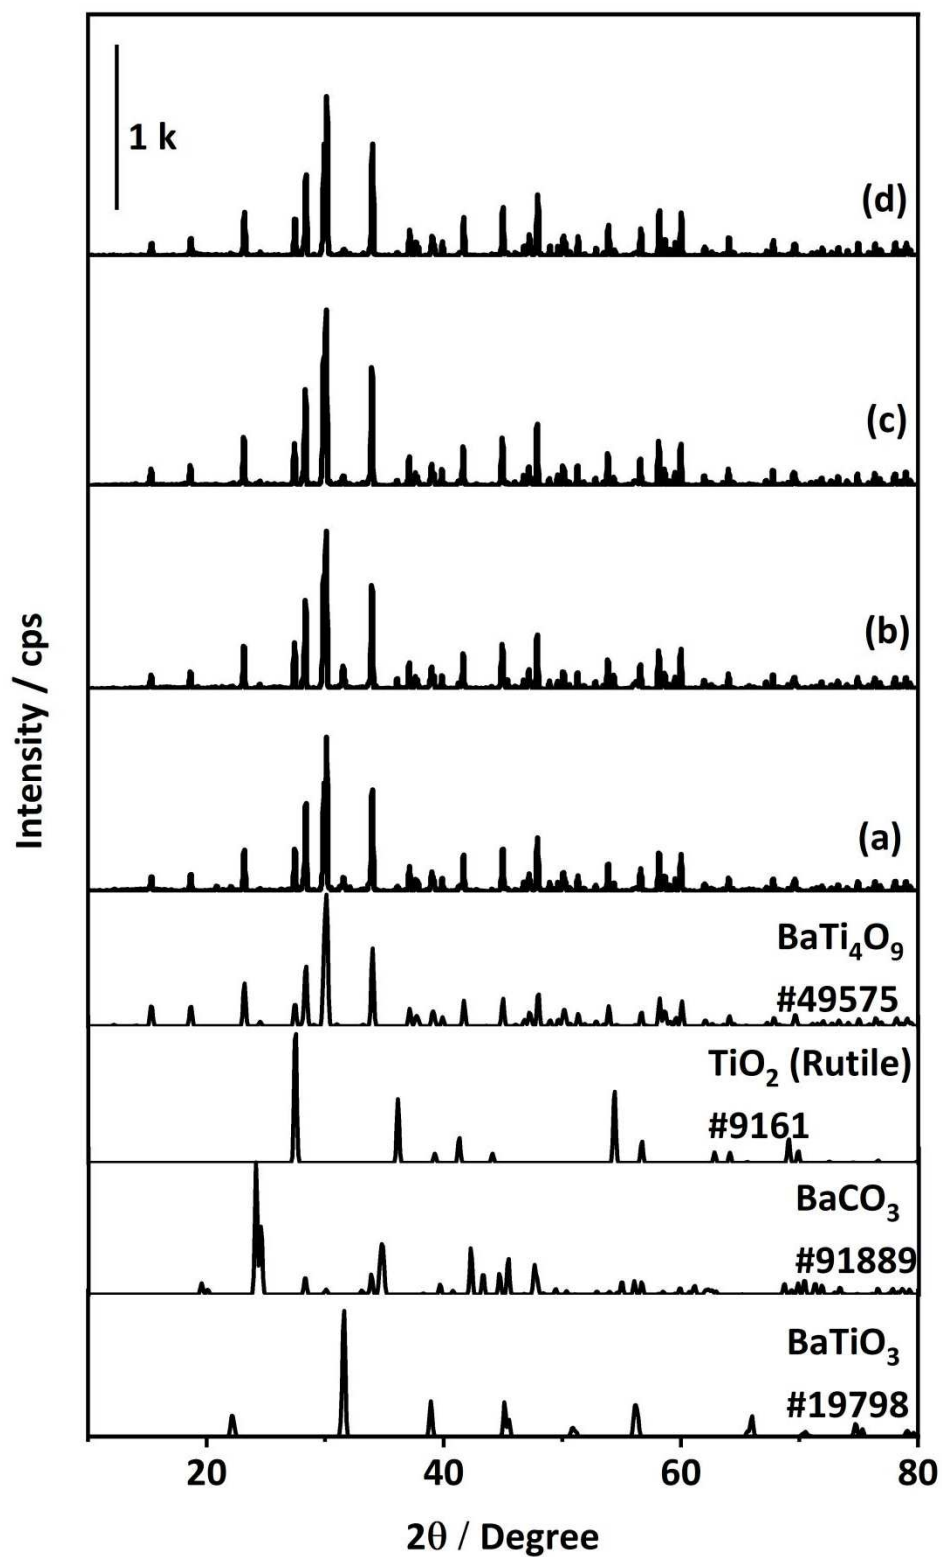

**Fig. S5** XRD patterns of the BT4( $x$ ,1273) samples prepared by different holding time ( $x$ ) of 5 (a), 10 (b), 20 (c), and 50 h (d) and references. Calcination was carried out at 1273 K. The intensity of the diffraction patterns from the database as references are normalized.

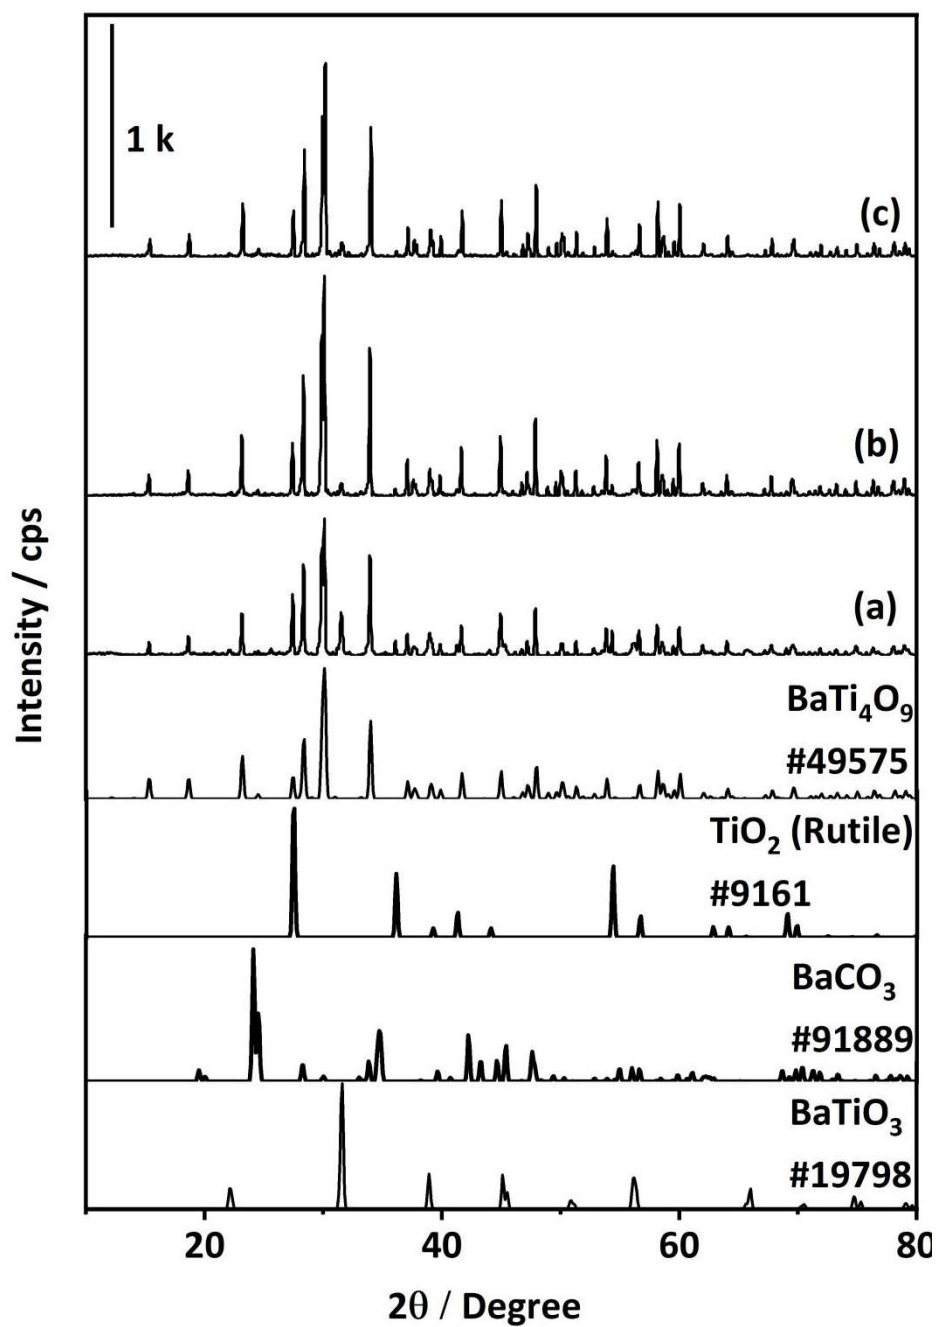

**Fig. S6** XRD patterns of BT4(20,y) prepared by different calcination temperature (y) of 1173 (a), 1273 (b), and 1373 K (c) and references. Calcination was carried out at each temperature for 20 h. The intensity of the diffraction patterns from the database as references are normalized.



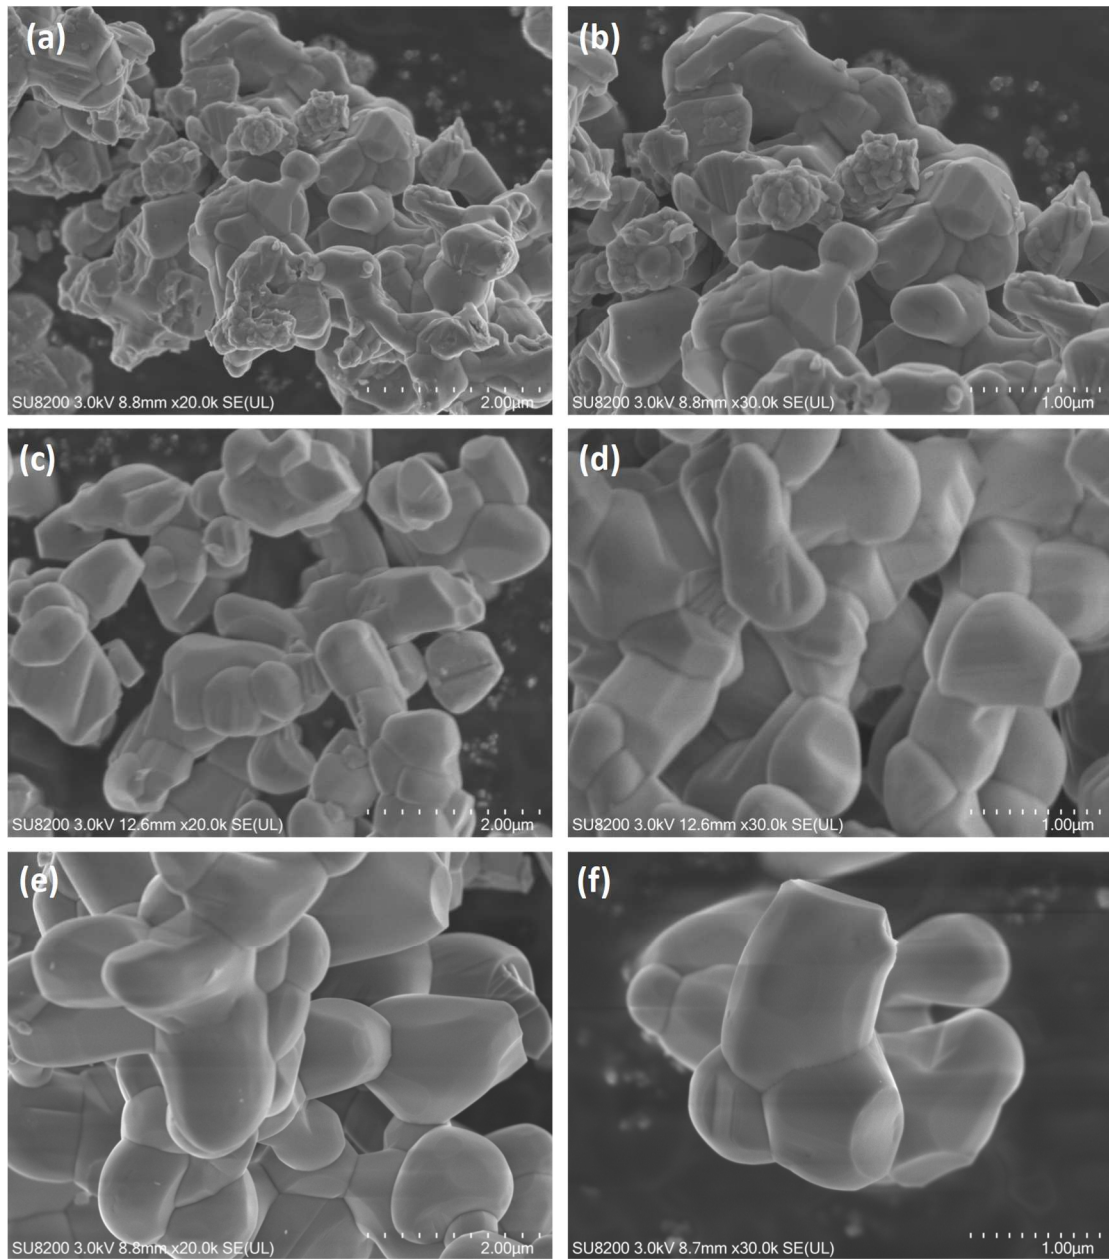

**Fig. S7** SEM images of the BT4(20,y) samples prepared by different calcination temperature ( $\gamma$ ) of 1173 (a), 1273 (c), and 1373 K (e) and amplified SEM image of BT4 under 1173 (b), 1273 (d), and 1373 K (f). Calcination was carried out at each temperature for 20 h.

**Table S3** SSA of bare BT4(*x,y*) samples prepared by different holding time and calcination temperature.

| Entry | Sample       | Specific Surface Area (SSA) <sup>a</sup><br>/ m <sup>2</sup> ·g <sup>-1</sup> | CO formation rate ( <i>R</i> <sub>CO</sub> )<br>/ μmol h <sup>-1</sup> |
|-------|--------------|-------------------------------------------------------------------------------|------------------------------------------------------------------------|
| 1     | BT4(5,1273)  | 2.27                                                                          | 2.54                                                                   |
| 2     | BT4(10,1273) | 1.78                                                                          | 2.89                                                                   |
| 3     | BT4(20,1273) | 1.54                                                                          | 4.08                                                                   |
| 4     | BT4(50,1273) | 1.48                                                                          | 4.16                                                                   |
| 5     | BT4(20,1173) | 2.04                                                                          | 1.97                                                                   |
| 6     | BT4(20,1373) | 1.43                                                                          | 2.11                                                                   |

<sup>a</sup> Estimated by a BET method from N<sub>2</sub> adsorption at 77 K

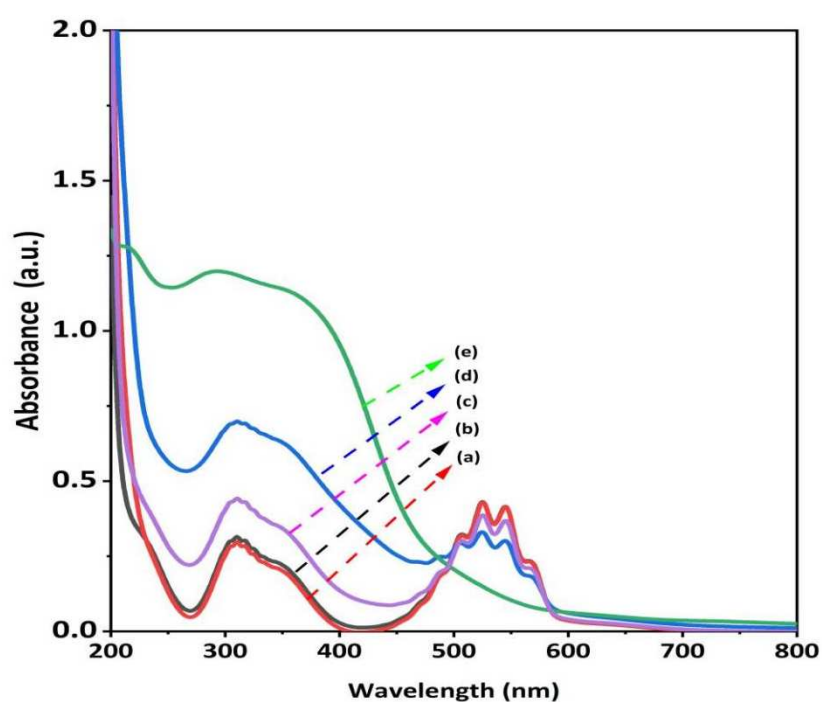

**Fig. S8** UV-vis spectra for the measurement of the concentration of H<sub>2</sub>O<sub>2</sub> in the resulting aqueous solution after the photocatalytic reaction test for 3 h with the photocatalyst samples, (a) Ag(1)/BT4, (c) MnO<sub>x</sub>(0.740)/BT4, and (d) Ag(1)-MnO<sub>x</sub>(0.492)/BT4. As reference, (b) the aqueous solution of KMnO<sub>4</sub> and (e) the aqueous solution of H<sub>2</sub>O<sub>2</sub> after the reaction with KMnO<sub>4</sub>. The BT4 sample used was the BT4(20,1273) sample.

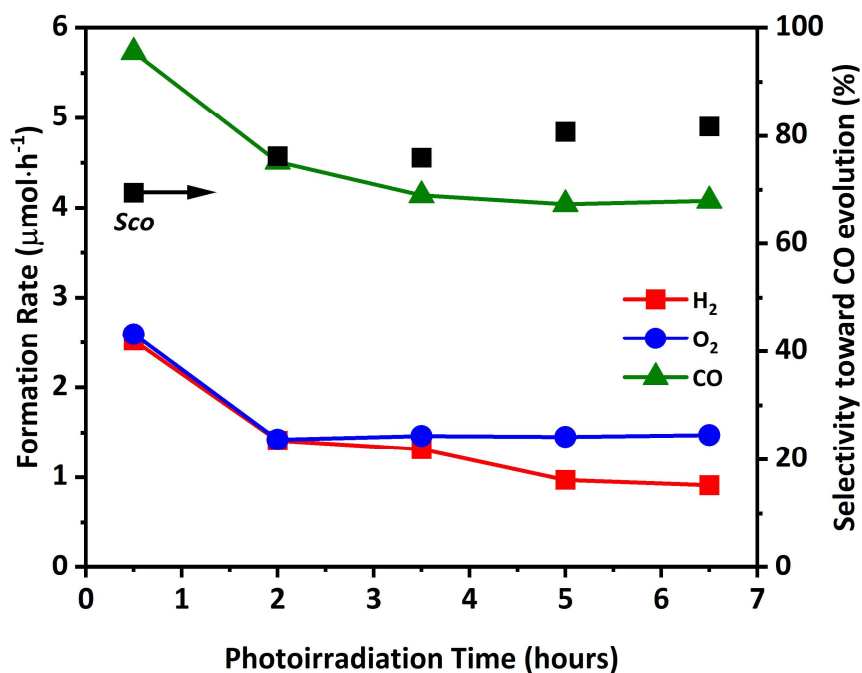

**Fig. S9** Time course of formation rates of H<sub>2</sub> (red), O<sub>2</sub> (blue), and CO (green) and selectivity toward CO evolution ( $S_{CO}$ , square) in the photocatalytic reaction tests for CO<sub>2</sub> reduction with water as electron donor with the Ag(1)-MnO<sub>x</sub>(0.492)/BT4(20,1273) sample. This photocatalytic reaction test was carried out with 0.3 g of catalyst in 360 mL of an aqueous solution of 1.0 M NaHCO<sub>3</sub>, which conditions were different from those in the main text (Fig. 2, 4, and 5).

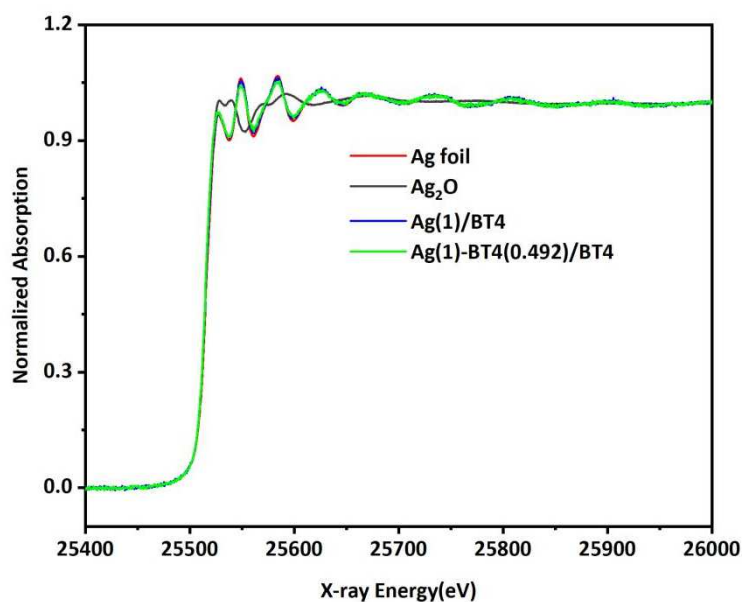

**Fig. S10** XANES of the prepared samples and references.

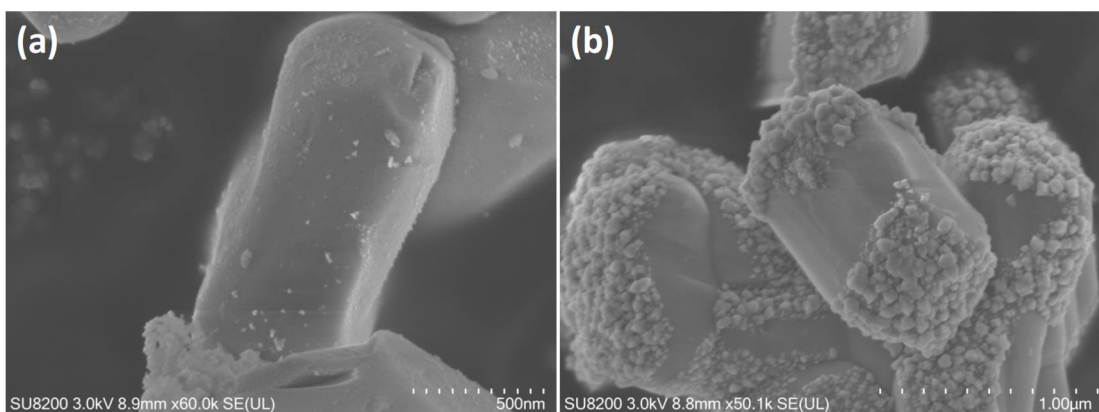

**Fig. S11** SEM images of (a) Pt/BT4 and (b) PbO<sub>2</sub>/BT4. The BT4 sample used was the BT4(20,1273) sample. The Pt (1 wt%) was loaded by the PD method without any sacrificial reagent while the Pb (3.62 wt%) was loaded by the PD method with NaIO<sub>3</sub> as a sacrificial reagent.

Schemes for the photodeposition used to obtain the Pt/BT4 and PbO<sub>2</sub>/BT4 samples (Fig. S9) are as follows:

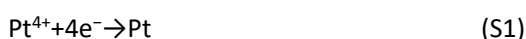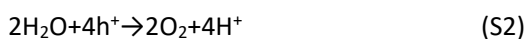

where eq. S1 shows the reduction of platinum cations and eq. S2 shows the oxidation of water to maintain charge balance in the aqueous solution.

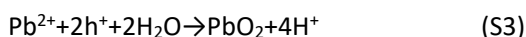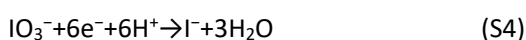

where eq. S3 shows the oxidation of lead cations to its oxide states and eq. S4 shows the corresponding reduction of iodate to iodide ions.

## References

1. D. E. Rase and R. Roy, *J. Am. Ceram. Soc.*, 2006, **38**, 102-113.
2. E. Song, D. H. Kim, E. J. Jeong, M. Choi, Y. Kim, H. J. Jung and M. Y. Choi, *Environ. Res.*, 2021, **202**, 111668.
3. S. Zhu, Y. Dai and X. Pei, *J. Mater. Sci-Mater. El.*, 2022, **33**, 16406-16413.
4. M. Kohno, T. Kaneko, S. Ogura, K. Sato, and Y. Inoue, *J. Chem. Soc., Faraday Trans.*, 1998, **94**, 89-94.
5. J. Fu, Y. Hou, M. Zheng and M. Zhu, *CrystEngComm*, 2017, **19**, 1115-1122.
6. T. Soltani, A. Yamamoto, S. P. Singh, A. Anzai, E. Fudo, A. Tanaka, H. Kominami and H. Yoshida, *ACS Appl. Energy Mater.*, 2021, **4**, 6500-6510.
7. H. Qiu, A. Yamamoto, E. Fudo, A. Tanaka, H. Kominami and H. Yoshida, *ACS Appl. Energy Mater.*, 2023, **6**, 11592-11601.
8. D.E.Rase, and R. Roy, *Solar energy*, 1980, **25**, 41-54.
